# Supplementary material for: Absolute gravity measurements at Brest (France) between 1998 and 2022
Source: Copernicus journal article supplement (doi:10.5194/essd-17-5859-2025), 2025-11-04
Supplement: Supplementary file [file essd-17-5859-2025-supplement-title-page.pdf › essd-17-5859-2025-supplement-title-page.pdf]

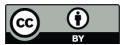

## *Supplement of*

# **Absolute gravity measurements at Brest (France) between 1998 and 2022**

**Marie-Françoise Lalancette et al.**

*Correspondence to:* Guy Wöppelmann ([guy.woepelmann@univ-lr.fr](mailto:guy.woepelmann@univ-lr.fr))

- [essd-17-5859-2025-supplement-title-page.pdf](#)
- [Shom1\\_19980329.project.txt](#)
- [Shom1\\_19991027.project.txt](#)
- [Shom1\\_20010628.project.txt](#)
- [Shom1\\_20020512.project.txt](#)
- [Shom1\\_20040128.project.txt](#)
- [Shom1\\_20050120.project.txt](#)
- [Shom1\\_20050928.project.txt](#)
- [Shom1\\_20060516.project.txt](#)
- [Shom1\\_20070801.project.txt](#)
- [Shom1\\_20080617.project.txt](#)
- [Shom1\\_20100723.project.txt](#)
- [Shom1\\_20110609.project.txt](#)
- [Shom1\\_20120419.project.txt](#)
- [Shom1\\_20130502.project.txt](#)
- [Shom1\\_20131009.project.txt](#)
- [Shom1\\_20150812.project.txt](#)
- [Shom1\\_20160525.project.txt](#)
- [Shom2\\_20180411.project.txt](#)
- [Shom2\\_20190801.project.txt](#)
- [Shom2\\_20220728.project.txt](#)
- [dataset\\_gravi\\_brest\\_R1.xlsx](#)

The copyright of individual parts of the supplement might differ from the article licence.
